# Supplementary material for: Postglacial migration shaped the genomic diversity and global distribution of the wild ancestor of lager-brewing hybrids
Source: PLoS Genet. 2020 Apr 6;16(4):e1008680. doi: 10.1371/journal.pgen.1008680 (PMC7162524; doi:10.1371/journal.pgen.1008680)
Supplement: S2 Table — Bonferroni-corrected Fisher’s Exact Test results of host and subpopulation association. (XLSX) [file pgen.1008680.s014.xlsx]

## Sheet: Host1
Host1	Pop	neither	notHost1Pop	host1NotPop	both	pval	oddsRatio	Correction	Sig
Nothofagus dombeyi	PB-1	124	56	3	9	0.00330895	6.57166	0.138976	FALSE
Nothofagus antarctica	PB-1	94	31	33	34	0.000411227	3.10386	0.0172715	TRUE
Nothofagus pumilio	PB-1	97	54	30	11	0.353262	0.660021	1	FALSE
Nothofagus obliqua	PB-1	123	61	4	4	0.446803	2.00852	1	FALSE
Nothofagus betuloides	PB-1	117	64	10	1	0.102111	0.183969	1	FALSE
Diospyros	PB-1	122	65	5	0	0.168906	0	1	FALSE
Araucaria araucana	PB-1	103	65	24	0	3.45e-05	0	0.00145057	TRUE
Nothofagus dombeyi	PA-2	145	35	12	0	0.12816	0	1	FALSE
Nothofagus antarctica	PA-2	106	19	51	16	0.169985	1.74496	1	FALSE
Nothofagus pumilio	PA-2	117	34	40	1	0.00230087	0.0866585	0.0966365	FALSE
Nothofagus obliqua	PA-2	151	33	6	2	0.639162	1.52148	1	FALSE
Nothofagus betuloides	PA-2	146	35	11	0	0.220202	0	1	FALSE
Diospyros	PA-2	152	35	5	0	0.586756	0	1	FALSE
Araucaria araucana	PA-2	149	19	8	16	1.45e-08	15.2918	6.11e-07	TRUE
Nothofagus dombeyi	PB-3	146	34	11	1	0.698168	0.391809	1	FALSE
Nothofagus antarctica	PB-3	100	25	57	10	0.437606	0.703005	1	FALSE
Nothofagus pumilio	PB-3	130	21	27	14	0.00544255	3.18615	0.228587	FALSE
Nothofagus obliqua	PB-3	149	35	8	0	0.354793	0	1	FALSE
Nothofagus betuloides	PB-3	156	25	1	10	1.2e-07	60.351	5.02e-06	TRUE
Diospyros	PB-3	152	35	5	0	0.586756	0	1	FALSE
Araucaria araucana	PB-3	133	35	24	0	0.00919687	0	0.386268	FALSE
Nothofagus dombeyi	PB-2	155	25	10	2	0.678132	1.23851	1	FALSE
Nothofagus antarctica	PB-2	98	27	67	0	4.18e-06	0	0.000175504	TRUE
Nothofagus pumilio	PB-2	139	12	26	15	2.29e-05	6.59022	0.000960446	TRUE
Nothofagus obliqua	PB-2	159	25	6	2	0.312914	2.10955	1	FALSE
Nothofagus betuloides	PB-2	154	27	11	0	0.368348	0	1	FALSE
Diospyros	PB-2	160	27	5	0	1	0	1	FALSE
Araucaria araucana	PB-2	149	19	16	8	0.00848471	3.88249	0.356358	FALSE
Nothofagus dombeyi	PA-1	171	9	12	0	1	0	1	FALSE
Nothofagus antarctica	PA-1	123	2	60	7	0.0094059	7.09845	0.395048	FALSE
Nothofagus pumilio	PA-1	142	9	41	0	0.208675	0	1	FALSE
Nothofagus obliqua	PA-1	175	9	8	0	1	0	1	FALSE
Nothofagus betuloides	PA-1	172	9	11	0	1	0	1	FALSE
Diospyros	PA-1	178	9	5	0	1	0	1	FALSE
Araucaria araucana	PA-1	159	9	24	0	0.605187	0	1	FALSE
Nothofagus dombeyi	NoAm	159	21	12	0	0.368152	0	1	FALSE
Nothofagus antarctica	NoAm	104	21	67	0	0.000117381	0	0.00493	TRUE
Nothofagus pumilio	NoAm	130	21	41	0	0.00872926	0	0.366629	FALSE
Nothofagus obliqua	NoAm	163	21	8	0	0.60187	0	1	FALSE
Nothofagus betuloides	NoAm	160	21	11	0	0.613158	0	1	FALSE
Diospyros	NoAm	171	16	0	5	9.86e-06	Inf	0.000414253	TRUE
Araucaria araucana	NoAm	147	21	24	0	0.0813676	0	1	FALSE

## Sheet: Host2
Host2	Pop	neither	notHost2Pop	host2NotPop	both	pval	oddsRatio	Correction	Sig
Nothofagus dombeyi	PB-1	126	60	1	5	0.0175986	10.37	0.844732	FALSE
Nothofagus antarctica	PB-1	100	42	27	23	0.0387033	2.02032	1	FALSE
Nothofagus pumilio	PB-1	98	55	29	10	0.259264	0.615907	1	FALSE
Nothofagus obliqua	PB-1	123	61	4	4	0.446803	2.00852	1	FALSE
Cyttaria darwinii	PB-1	122	64	5	1	0.665696	0.382833	1	FALSE
Cyttaria harioti	PB-1	114	51	13	14	0.0470442	2.39527	1	FALSE
Diospyros	PB-1	122	65	5	0	0.168906	0	1	FALSE
Araucaria araucana	PB-1	103	65	24	0	3.45e-05	0	0.00165779	TRUE
Nothofagus dombeyi	PA-2	151	35	6	0	0.594269	0	1	FALSE
Nothofagus antarctica	PA-2	122	20	35	15	0.0182856	2.59929	0.877708	FALSE
Nothofagus pumilio	PA-2	119	34	38	1	0.00237134	0.0927624	0.113824	FALSE
Nothofagus obliqua	PA-2	151	33	6	2	0.639162	1.52148	1	FALSE
Cyttaria darwinii	PA-2	151	35	6	0	0.594269	0	1	FALSE
Cyttaria harioti	PA-2	131	34	26	1	0.0328568	0.149082	1	FALSE
Diospyros	PA-2	152	35	5	0	0.586756	0	1	FALSE
Araucaria araucana	PA-2	149	19	8	16	1.45e-08	15.2918	6.98e-07	TRUE
Nothofagus dombeyi	PB-3	152	34	5	1	1	0.894622	1	FALSE
Nothofagus antarctica	PB-3	112	30	45	5	0.0910031	0.416457	1	FALSE
Nothofagus pumilio	PB-3	132	21	25	14	0.00417995	3.4913	0.200637	FALSE
Nothofagus obliqua	PB-3	149	35	8	0	0.354793	0	1	FALSE
Cyttaria darwinii	PB-3	156	30	1	5	0.00081788	25.3394	0.0392582	TRUE
Cyttaria harioti	PB-3	139	26	18	9	0.0552379	2.65618	1	FALSE
Diospyros	PB-3	152	35	5	0	0.586756	0	1	FALSE
Araucaria araucana	PB-3	133	35	24	0	0.00919687	0	0.44145	FALSE
Nothofagus dombeyi	PB-2	159	27	6	0	0.597448	0	1	FALSE
Nothofagus antarctica	PB-2	115	27	50	0	0.000218648	0	0.0104951	TRUE
Nothofagus pumilio	PB-2	140	13	25	14	7.06e-05	5.95208	0.00338865	TRUE
Nothofagus obliqua	PB-2	159	25	6	2	0.312914	2.10955	1	FALSE
Cyttaria darwinii	PB-2	159	27	6	0	0.597448	0	1	FALSE
Cyttaria harioti	PB-2	141	24	24	3	0.772727	0.735472	1	FALSE
Diospyros	PB-2	160	27	5	0	1	0	1	FALSE
Araucaria araucana	PB-2	149	19	16	8	0.00848471	3.88249	0.407266	FALSE
Nothofagus dombeyi	PA-1	177	9	6	0	1	0	1	FALSE
Nothofagus antarctica	PA-1	140	2	43	7	0.00133538	11.2161	0.0640984	FALSE
Nothofagus pumilio	PA-1	144	9	39	0	0.20816	0	1	FALSE
Nothofagus obliqua	PA-1	175	9	8	0	1	0	1	FALSE
Cyttaria darwinii	PA-1	177	9	6	0	1	0	1	FALSE
Cyttaria harioti	PA-1	156	9	27	0	0.364334	0	1	FALSE
Diospyros	PA-1	178	9	5	0	1	0	1	FALSE
Araucaria araucana	PA-1	159	9	24	0	0.605187	0	1	FALSE
Nothofagus dombeyi	NoAm	165	21	6	0	1	0	1	FALSE
Nothofagus antarctica	NoAm	121	21	50	0	0.00249741	0	0.119876	FALSE
Nothofagus pumilio	NoAm	132	21	39	0	0.00889861	0	0.427133	FALSE
Nothofagus obliqua	NoAm	163	21	8	0	0.60187	0	1	FALSE
Cyttaria darwinii	NoAm	165	21	6	0	1	0	1	FALSE
Cyttaria harioti	NoAm	144	21	27	0	0.0487812	0	1	FALSE
Diospyros	NoAm	171	16	0	5	9.86e-06	Inf	0.000473432	TRUE
Araucaria araucana	NoAm	147	21	24	0	0.0813676	0	1	FALSE
